# Supplementary material for: The exploration of novel fluorescent copper–cysteamine nanosheets for sequential detection of Fe3+and dopamine and fabrication of molecular logic circuits
Source: Royal Society of Chemistry journal article supplement (doi:10.1039/d0tc02843f), 2020-01-01
Supplement: d0tc02843f1.pdf [file d0tc02843f1.pdf]

## Electronic Supporting Information

### The Exploration of Novel Fluorescent Copper-Cysteamine Nanosheets for Sequential Detection of Fe<sup>3+</sup> and Dopamine and Fabrication of Molecular Logic Circuit

Zhenzhen Huang,<sup>a</sup> Wenzhi Song,<sup>b</sup> Yue Li,<sup>a</sup> Lingyun Wang,<sup>c, e</sup> Nil Kanatha Pandey,<sup>c</sup> Lalit Chudal,<sup>c</sup> Min Wang,<sup>a</sup> Yachun Li,<sup>d</sup> Lanlan Zhao,<sup>b</sup> Wanzhong Yin\*<sup>d</sup> and Wei Chen\*<sup>c</sup>

<sup>a</sup>College of Chemistry, Jilin University, Changchun 130012, P. R. China

<sup>b</sup>Department of Stomatology, China-Japan Union Hospital, Jilin University, P. R. China

<sup>c</sup>Department of Physics, University of Texas at Arlington, Arlington, TX 76019, USA, E-mail: weichen@uta.edu

<sup>d</sup>Department of Otorhinolaryngology Head and Neck Surgery, First clinical hospital, Jilin University, P. R. China, E-mail: yinwanzhong88@hotmail.com

<sup>e</sup>School of Chemistry and Chemical Engineering, South China University of Technology, Guangzhou, China,

## Materials and methods

Copper(II) chloride ( $\geq 99\%$ ), iron(III) chloride ( $\geq 99\%$ ), cysteamine hydrochloride ( $\geq 98\%$ ), and dopamine hydrochloride ( $\geq 99\%$ ) were obtained from Sigma-Aldrich. Tetrabutylammonium cyanide was purchased from Shanghai Aladdin Bio-Chem Technology Co., Ltd. All other reagents were purchased from Sinopharm Chemical Reagent Co., Ltd.

Fluorescence spectra were acquired by using a Shimadzu RF-5301PC fluorometer. Time-resolved fluorescence and absolute quantum yield measurements were performed on an Edinburgh FS 920 fluorometer. Fourier transform infrared (FTIR) spectroscopy was performed on a Thermo Nicolet 6700 FTIR spectrometer. X-ray diffraction (XRD) of Cu-Cy powder was performed on a PANalytical B.V., Empyrean X-Ray Diffractometer. Atomic force microscope (AFM) measurement was performed by Bruker-Fastscan AFM. X-ray photoelectron spectrometry (XPS) study was acquired by a Thermo Scientific Escalab 250 XPS spectrometer with Al  $K\alpha$  X-ray radiation (1486.6 eV). The XPS sample was prepared by pressing the Cu-Cy powder directly onto the surface of an electrically conductive adhesive tape. Scanning electron microscopy (SEM) and energy-dispersive X-ray spectroscopy (EDS) were carried out on a FEI Nova NanoSEM 450 microscope equipped with an EDS spectrometer at an accelerating voltage of 10 kV. For SEM/EDS study, the sample was prepared by dropping 20  $\mu\text{L}$  of Cu-Cy (50  $\mu\text{g}/\text{mL}$ ) dispersion onto a silicon wafer and dried in a vacuum oven at 40  $^{\circ}\text{C}$  overnight.

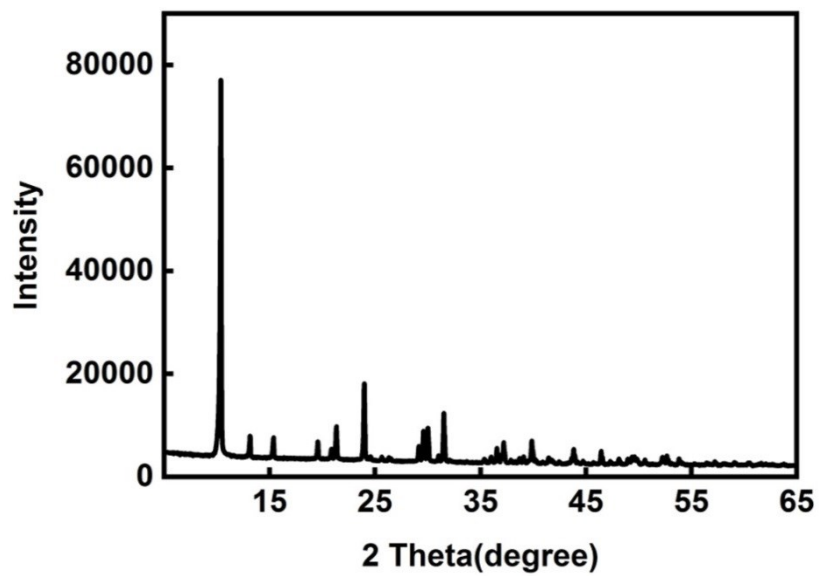

**Fig. S1** XRD pattern of Cu-Cy.

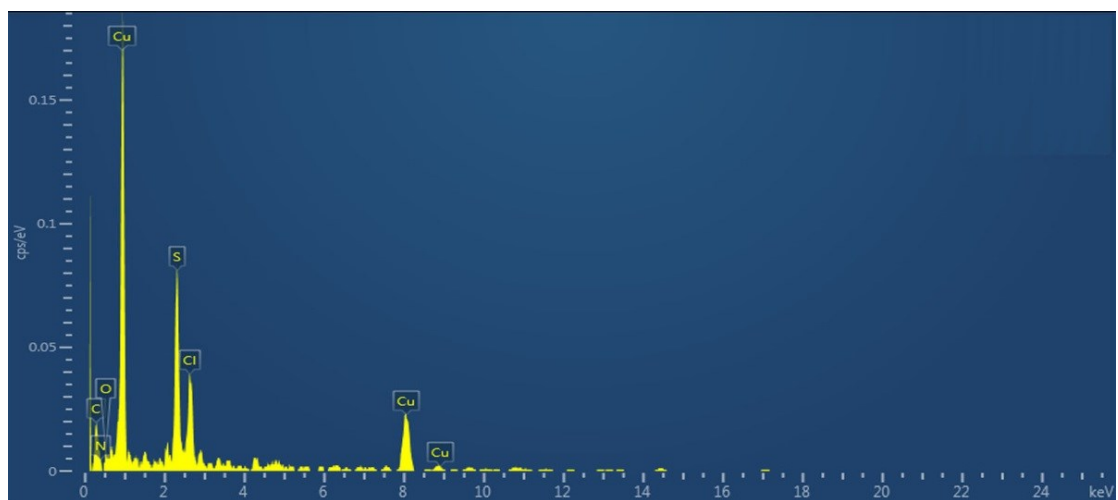

**Fig. S2** EDS spectrum of Cu-Cy.

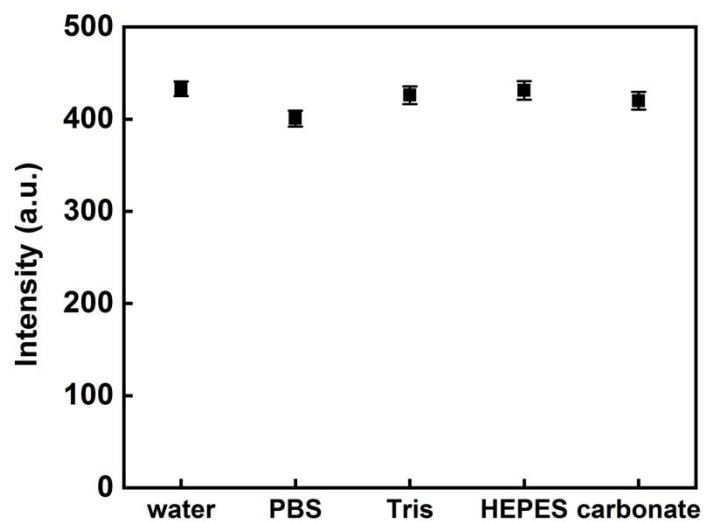

**Fig. S3** Fluorescence emission intensity of Cu-Cy (50 µg/mL) in different buffer solutions.

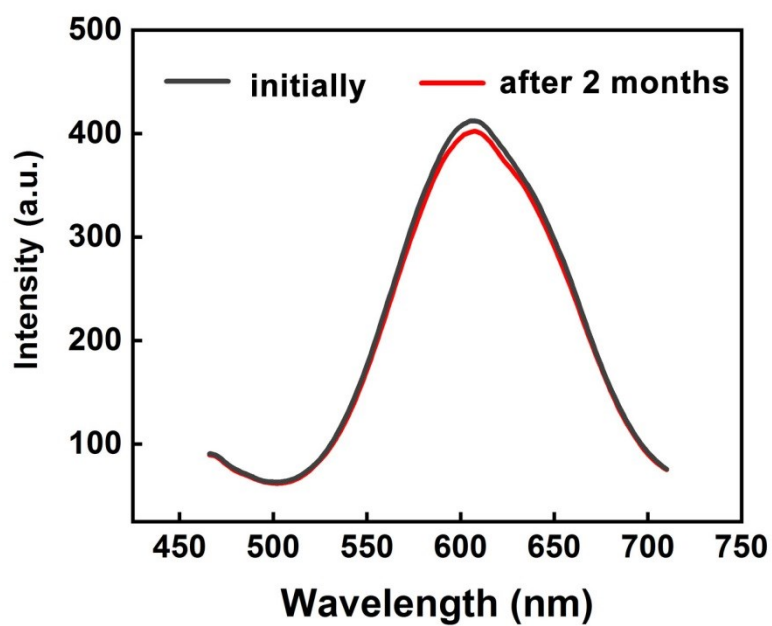

**Fig. S4** Fluorescence emission spectra of Cu-Cy dispersion (50 µg/mL) initially and after 2 months of storage.

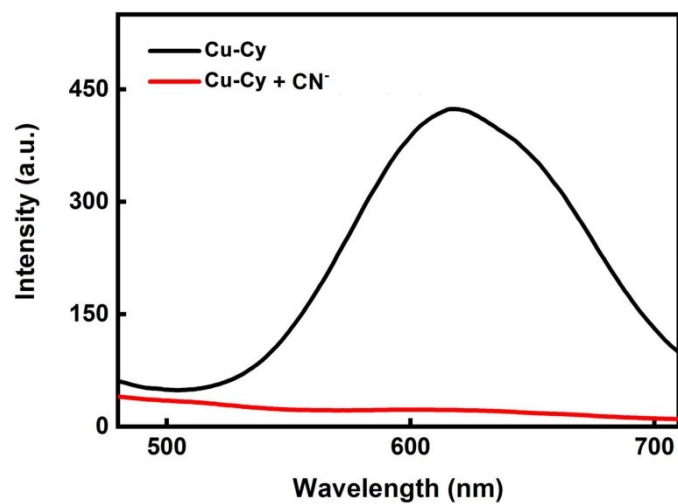

**Fig. S5** Fluorescence emission spectra of Cu-Cy dispersion (50  $\mu\text{g/mL}$ ) before and after the addition of  $\text{CN}^-$  (400  $\mu\text{M}$ ).

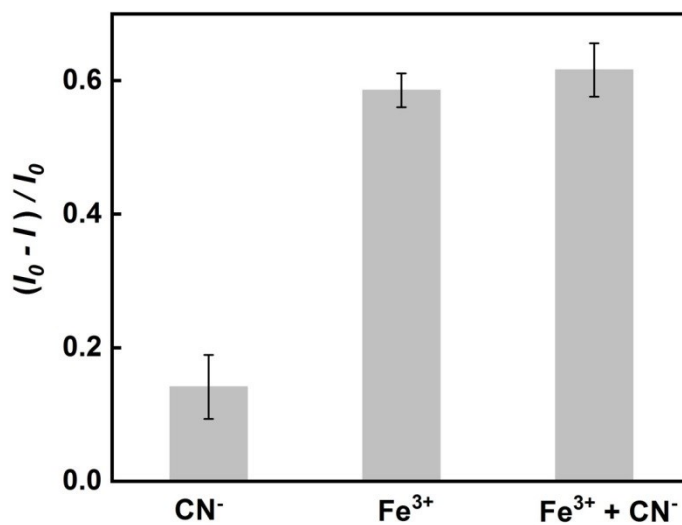

**Fig. S6** Fluorescence response of Cu-Cy (50  $\mu\text{g/mL}$ ) to  $\text{CN}^-$  (1.9  $\mu\text{M}$ ),  $\text{Fe}^{3+}$  (400  $\mu\text{M}$ ), and  $\text{Fe}^{3+}$  (400  $\mu\text{M}$ ) +  $\text{CN}^-$  (1.9  $\mu\text{M}$ ).

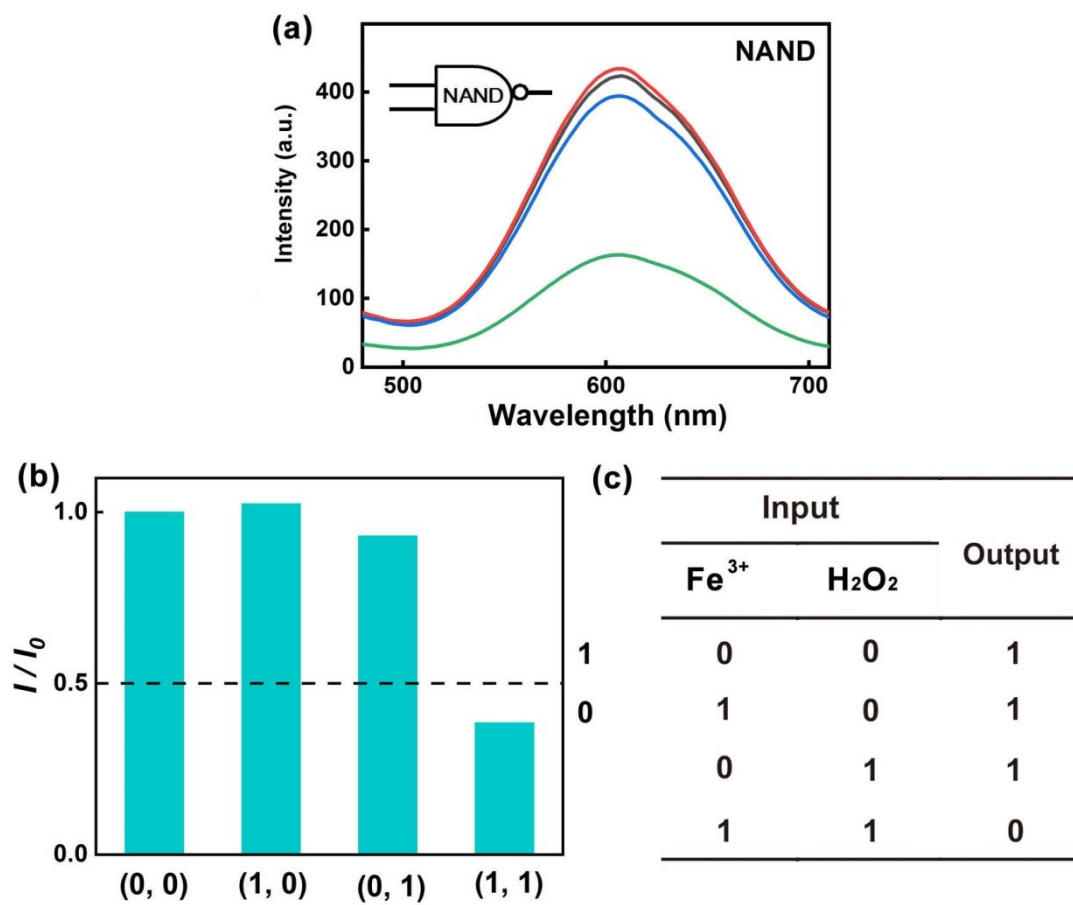

**Fig S7.** (a) Fluorescence spectra (b)  $I/I_0$ , and (c) truth table of Cu-Cy-based NAND gate.

**Table S1.** Comparison of fluorescent methods for Fe<sup>3+</sup> determination

| <b>Probe</b>                        | <b>LOD (<math>\mu\text{M}</math>)</b> | <b>Detection range (<math>\mu\text{M}</math>)</b> | <b>Ref.</b>      |
|-------------------------------------|---------------------------------------|---------------------------------------------------|------------------|
| Phosphazene-based organic probe     | 4.8                                   | 0-50                                              | 1                |
| Allylamine-graphene oxide nanosheet | 4.6                                   | 0–120                                             | 2                |
| Tyloxapol                           | 2.2                                   | 0-100                                             | 3                |
| HfIV-based MOF                      | 0.27                                  | 30-70                                             | 4                |
| MOF MIL-53(Al)                      | 0.9                                   | 3-200                                             | 5                |
| Carbon dots                         | 0.32                                  | 0-20                                              | 6                |
| N/P codoped carbon dots             | 0.33                                  | 1-150                                             | 7                |
| B, N Co-doped carbon nanodots       | 0.1                                   | 0-100                                             | 8                |
| Ag nanoclusters                     | 0.12                                  | 0.5-20                                            | 9                |
| <b>Cu-Cy</b>                        | <b>0.7</b>                            | <b>1-500</b>                                      | <b>this work</b> |

**Table S2.** Detection of Fe<sup>3+</sup> in tap water by using the Cu-Cy probe

| Sample | Spiked Fe <sup>3+</sup> (μM) | Determined (μM) | Recovery (%) | RSD (% , n=5) |
|--------|------------------------------|-----------------|--------------|---------------|
| 1      | 10.0                         | 9.8             | 98.0         | 4.8           |
| 2      | 50.0                         | 51.2            | 102.4        | 2.2           |
| 3      | 100.0                        | 97.7            | 97.7         | 3.1           |

**Table S3** Comparison of fluorescent methods for dopamine determination

| Probe                                               | LOD (nM)  | Detection range (μM) | Ref.             |
|-----------------------------------------------------|-----------|----------------------|------------------|
| Doxorubicin-graphene                                | -         | 0.83-33              | 10               |
| Lanthanide-doped nanoparticles                      | 47        | 0-10                 | 11               |
| Carbon dots                                         | 68        | 0.1-10               | 6                |
| Graphene quantum dots                               | 160       | 0.5-30               | 12               |
| Cu nanoclusters                                     | 280       | 0.5-50               | 13               |
| Ag nanoclusters -MoS <sub>2</sub> nanosheet         | 92        | 0.3-1                | 14               |
| Au nanoclusters /graphitic carbon nitride nanosheet | 18        | 0.05-8.0             | 15               |
| <b>Cu-Cy</b>                                        | <b>20</b> | <b>1-20</b>          | <b>this work</b> |

**Table S4.** Detection of dopamine in human serum by using the Cu-Cy probe

| Sample | Spiked Dopa (μM) | Determined (μM) | Recovery (%) | RSD (% , n=3) |
|--------|------------------|-----------------|--------------|---------------|
| 1      | 2                | 2.1             | 105          | 1.2           |
| 2      | 5                | 5.2             | 104          | 4.6           |
| 3      | 10               | 10.1            | 101          | 3.7           |



**Table S5.** Truth table of the Cu-Cy-based four-input molecular logic circuit

| Input    |                  |                  |                               | Output |
|----------|------------------|------------------|-------------------------------|--------|
| dopamine | Fe <sup>3+</sup> | Fe <sup>2+</sup> | H <sub>2</sub> O <sub>2</sub> |        |
| 0        | 0                | 0                | 0                             | 1      |
| 1        | 0                | 0                | 0                             | 1      |
| 0        | 1                | 0                | 0                             | 0      |
| 0        | 0                | 1                | 0                             | 1      |
| 0        | 0                | 0                | 1                             | 1      |
| 1        | 1                | 0                | 0                             | 1      |
| 1        | 0                | 1                | 0                             | 1      |
| 1        | 0                | 0                | 1                             | 1      |
| 0        | 1                | 1                | 0                             | 0      |
| 0        | 1                | 0                | 1                             | 0      |
| 0        | 0                | 1                | 1                             | 0      |
| 1        | 1                | 1                | 0                             | 1      |
| 1        | 0                | 1                | 1                             | 1      |
| 1        | 1                | 0                | 1                             | 1      |
| 0        | 1                | 1                | 1                             | 0      |
| 1        | 1                | 1                | 1                             | 1      |

## References

1. R. Kagit, M. Yildirim, O. Ozay, S. Yesilot and H. Ozay, *Inorg. Chem.*, 2014, **53**, 2144-2151.
2. L. He, J. Li and J. H. Xin, *Biosens. Bioelectron.*, 2015, **70**, 69-73.
3. L. L. Zhao, X. Xin, P. Ding, A. X. Song, Z. C. Xie, J. L. Shen and G. Y. Xu, *Anal. Chim. Acta*, 2016, **926**, 99-106.
4. R. Dalapati and S. Biswas, *Chem.-Asian J.*, 2019, **14**, 2822-2830.
5. C. X. Yang, H. B. Ren and X. P. Yan, *Anal. Chem.*, 2013, **85**, 7441-7446.
6. K. G. Qu, J. S. Wang, J. S. Ren and X. G. Qu, *Chem.-Eur. J.*, 2013, **19**, 7243-7249.
7. J. F. Shangguan, J. Huang, D. G. He, X. X. He, K. M. Wang, R. Z. Ye, X. Yang, T. P. Qing and J. L. Tang, *Anal. Chem.*, 2017, **89**, 7477-7484.
8. L. J. Mohammed and K. M. Omer, *Sci. Rep.*, 2020, **10**, 3028-3028.
9. Z. Chen, D. Lu, G. Zhang, J. Yang, C. Dong and S. Shuang, *Sens. Actuators, B,-Chem.*, 2014, **202**, 631-637.
10. R. Cheng, C. Ge, L. Qi, Z. Zhang, J. Ma, H. Huang, T. Pan, Q. Dai and L. Dai, *J. Phys. Chem. C*, 2018, **122**, 13314-13321.
11. X. C. Ling, R. K. Shi, J. Zhang, D. M. Liu, M. R. Weng, C. W. Zhang, M. Lu, X. J. Xie, L. Huang and W. Huang, *Acs Sensors*, 2018, **3**, 1683-1689.
12. H. Liu, N. Li, H. Q. Zhang, F. Zhang and X. G. Su, *Talanta*, 2018, **189**, 190-195.
13. Z. Miao, W. L. Hou, M. L. Liu, Y. Y. Zhang and S. Z. Yao, *New J. Chem.* 2018, **42**, 1446-1456.
14. F. Qu, Y. N. Liu, R. M. Kong and J. M. You, *Microchim. Acta*, 2017, **184**, 4417-4424.
15. B. Xu, Y. Su, L. Li, R. Liu and Y. Lv, *Sens. Actuators, B,-Chem.*, 2017, **246**, 380-388.
